# Supplementary material for: A global map of hemispheric influenza vaccine recommendations based on local patterns of viral circulation
Source: PubMed Central journal article supplement (PMC4664865; doi:10.1038/srep17214), 2015-12-01
Supplement: srep17214-s1.pdf [file srep17214-s1.pdf]

supplementary information to the article

***A global map of hemispheric influenza vaccine recommendations***

***based on local patterns of viral circulation***

Wladimir J. Alonso<sup>1\*</sup>, Christine Yu<sup>3</sup>, Cecile Viboud<sup>1</sup>, Stephanie A. Richard<sup>1</sup>, Cynthia Schuck-Paim<sup>2</sup>, Lone Simonsen<sup>3</sup>, Wyller A. Mello<sup>4</sup>, & Mark A. Miller<sup>1</sup>

\* wladimir.alonso@nih.gov

<sup>1</sup> Fogarty International Center, National Institutes of Health, MD, USA

<sup>2</sup> Wolfson College, Oxford, UK

<sup>3</sup> George Washington University, DC, USA

<sup>4</sup> Evandro Chagas Institute, WHO Global Influenza Surveillance Network, Para, Brazil

**Table S1. Countries included in the analysis, month of primary peak and most appropriate vaccine** (most recent vaccine at least two months before the primary peak) . Countries that should adopt the vaccine recommended for the opposite hemisphere (as measured by their capital latitude) are highlighted with a grey background. Key of colors follow the ones used in the article

| Country             | Latitude Capital | Classification * | Hemisphere | Month primary peak** | Correct vaccine |
|---------------------|------------------|------------------|------------|----------------------|-----------------|
| Iceland             | 64.1             | Temperate        | Northern   | 2.4                  | NHR             |
| Finland             | 60.2             | Temperate        | Northern   | 2.0                  | NHR             |
| Norway              | 59.9             | Temperate        | Northern   | 2.1                  | NHR             |
| Sweden              | 59.3             | Temperate        | Northern   | 2.6                  | NHR             |
| Latvia              | 56.9             | Temperate        | Northern   | 2.8                  | NHR             |
| Russian Federation  | 55.7             | Temperate        | Northern   | 2.8                  | NHR             |
| Denmark             | 55.7             | Temperate        | Northern   | 2.1                  | NHR             |
| Estonia             | 55.4             | Temperate        | Northern   | 2.4                  | NHR             |
| Lithuania           | 54.7             | Temperate        | Northern   | 1.9                  | NHR             |
| Belarus             | 53.9             | Temperate        | Northern   | 2.5                  | NHR             |
| Ireland             | 53.3             | Temperate        | Northern   | 1.9                  | NHR             |
| Germany             | 52.5             | Temperate        | Northern   | 2.4                  | NHR             |
| Netherlands         | 52.4             | Temperate        | Northern   | 2.2                  | NHR             |
| Poland              | 52.2             | Temperate        | Northern   | 1.8                  | NHR             |
| UK                  | 51.5             | Temperate        | Northern   | 1.4                  | NHR             |
| Kazakhstan          | 51.2             | Temperate        | Northern   | 2.4                  | NHR             |
| Belgium             | 50.9             | Temperate        | Northern   | 2.0                  | NHR             |
| Ukraine             | 50.5             | Temperate        | Northern   | 2.9                  | NHR             |
| Czech Republic      | 50.1             | Temperate        | Northern   | 2.2                  | NHR             |
| Luxembourg          | 49.6             | Temperate        | Northern   | 2.0                  | NHR             |
| France              | 48.9             | Temperate        | Northern   | 2.1                  | NHR             |
| Austria             | 48.2             | Temperate        | Northern   | 2.6                  | NHR             |
| Slovakia            | 48.1             | Temperate        | Northern   | 2.7                  | NHR             |
| Mongolia            | 47.9             | Temperate        | Northern   | 2.5                  | NHR             |
| Hungary             | 47.5             | Temperate        | Northern   | 2.6                  | NHR             |
| Republic of Moldova | 47.0             | Temperate        | Northern   | 2.5                  | NHR             |
| Switzerland         | 46.9             | Temperate        | Northern   | 2.3                  | NHR             |
| Slovenia            | 46.1             | Temperate        | Northern   | 2.3                  | NHR             |
| Croatia             | 45.8             | Temperate        | Northern   | 2.5                  | NHR             |
| Canada              | 45.4             | Temperate        | Northern   | 1.3                  | NHR             |
| Serbia              | 44.8             | Temperate        | Northern   | 2.5                  | NHR             |
| Romania             | 44.4             | Temperate        | Northern   | 2.3                  | NHR             |
| Bosnia and Herzeg.  | 43.9             | Temperate        | Northern   | 1.9                  | NHR             |

|                           |             |                 |          |      |     |
|---------------------------|-------------|-----------------|----------|------|-----|
| Kyrgyzstan                | 42.9        | Temperate       | Northern | 1.6  | NHR |
| Bulgaria                  | 42.7        | Temperate       | Northern | 2.3  | NHR |
| Italy                     | 41.9        | Temperate       | Northern | 2.0  | NHR |
| Georgia                   | 41.7        | Temperate       | Northern | 2.4  | NHR |
| Albania                   | 41.3        | Temperate       | Northern | 2.2  | NHR |
| Uzbekistan                | 41.0        | Temperate       | Northern | 1.5  | NHR |
| Azerbaijan                | 40.4        | Temperate       | Northern | 3.5  | NHR |
| Spain                     | 40.4        | Temperate       | Northern | 2.0  | NHR |
| Armenia                   | 40.2        | Temperate       | Northern | 2.8  | NHR |
| Turkey                    | 39.9        | Temperate       | Northern | 1.7  | NHR |
| USA                       | 38.9        | Temperate       | Northern | 1.1  | NHR |
| Portugal                  | 38.7        | Temperate       | Northern | 2.1  | NHR |
| Greece                    | 38.0        | Temperate       | Northern | 2.2  | NHR |
| Republic of Korea         | 37.6        | Temperate       | Northern | 1.9  | NHR |
| Tunisia                   | 36.8        | Temperate       | Northern | 2.4  | NHR |
| Algeria                   | 36.8        | Temperate       | Northern | 1.6  | NHR |
| Malta                     | 35.9        | Temperate       | Northern | 1.6  | NHR |
| Iran                      | 35.7        | Temperate       | Northern | 1.3  | NHR |
| Japan                     | 35.7        | Temperate       | Northern | 1.7  | NHR |
| Afghanistan               | 34.5        | Temperate       | Northern | 1.4  | NHR |
| Morocco                   | 34.0        | Temperate       | Northern | 1.3  | NHR |
| Pakistan                  | 33.7        | Temperate       | Northern | 1.7  | NHR |
| Iraq                      | 33.3        | Temperate       | Northern | 1.9  | NHR |
| Jordan                    | 32.0        | Temperate       | Northern | 12.7 | NHR |
| Israel                    | 31.8        | Temperate       | Northern | 2.0  | NHR |
| Egypt                     | 30.0        | Temperate       | Northern | 1.1  | NHR |
| Bhutan                    | 27.0        | Temperate       | Northern | 8.3  | SHR |
| Nepal                     | 27.0        | Temperate       | Northern | 8.5  | SHR |
| Bahrain                   | 26.0        | Temperate       | Northern | 12.6 | NHR |
| Qatar                     | 25.3        | Temperate       | Northern | 12.6 | NHR |
| Bangladesh                | 23.7        | Temperate       | Northern | 6.9  | SHR |
| Oman                      | 23.6        | Temperate       | Northern | 1.6  | NHR |
| <b>Cuba</b>               | <b>23.1</b> | <b>Tropical</b> | Northern | 5.5  | NHR |
| <b>Viet Nam</b>           | <b>21.0</b> | <b>Tropical</b> | Northern | 7.0  | SHR |
| <b>Mexico</b>             | <b>19.4</b> | <b>Tropical</b> | Northern | 1.5  | NHR |
| <b>Dominican Republic</b> | <b>18.5</b> | <b>Tropical</b> | Northern | 6.4  | SHR |
| <b>Mauritania</b>         | <b>18.1</b> | <b>Tropical</b> | Northern | 1.3  | NHR |
| <b>Jamaica</b>            | <b>18.0</b> | <b>Tropical</b> | Northern | 10.1 | SHR |
| <b>Laos</b>               | <b>18.0</b> | <b>Tropical</b> | Northern | 10.2 | SHR |
| <b>Guadeloupe</b>         | <b>16.0</b> | <b>Tropical</b> | Northern | 2.0  | NHR |

|                     |       |          |          |      |     |
|---------------------|-------|----------|----------|------|-----|
| Senegal             | 14.7  | Tropical | Northern | 10.3 | SHR |
| Guatemala           | 14.6  | Tropical | Northern | 3.5  | NHR |
| Martinique          | 14.6  | Tropical | Northern | 2.4  | NHR |
| Philippines         | 14.6  | Tropical | Northern | 8.5  | SHR |
| Honduras            | 14.1  | Tropical | Northern | 8.6  | SHR |
| Thailand            | 13.8  | Tropical | Northern | 9.1  | SHR |
| El Salvador         | 13.7  | Tropical | Northern | 7.0  | SHR |
| Niger               | 13.5  | Tropical | Northern | 2.3  | NHR |
| Mali                | 12.7  | Tropical | Northern | 10.0 | SHR |
| Burkina Faso        | 12.4  | Tropical | Northern | 2.5  | NHR |
| Nicaragua           | 12.1  | Tropical | Northern | 10.3 | SHR |
| Cambodia            | 11.6  | Tropical | Northern | 10.5 | SHR |
| Venezuela           | 10.5  | Tropical | Northern | 3.8  | NHR |
| Costa Rica          | 9.9   | Tropical | Northern | 7.4  | SHR |
| Nigeria             | 9.1   | Tropical | Northern | 10.0 | SHR |
| Ethiopia            | 9.0   | Tropical | Northern | 11.4 | SHR |
| Panama              | 9.0   | Tropical | Northern | 6.9  | SHR |
| Sierra Leone        | 8.5   | Tropical | Northern | 9.1  | SHR |
| Sri Lanka           | 6.9   | Tropical | Northern | 12.6 | NHR |
| Côte d'Ivoire       | 6.9   | Tropical | Northern | 10.4 | SHR |
| Togo                | 6.1   | Tropical | Northern | 11.3 | SHR |
| Ghana               | 5.6   | Tropical | Northern | 3.9  | NHR |
| French Guiana       | 4.9   | Tropical | Northern | 4.2  | NHR |
| Colombia            | 4.6   | Tropical | Northern | 6.2  | SHR |
| Cent. Afr. Republic | 4.4   | Tropical | Northern | 9.2  | SHR |
| Cameroon            | 3.9   | Tropical | Northern | 10.9 | SHR |
| Malaysia            | 3.1   | Tropical | Northern | 4.7  | NHR |
| Singapore           | 1.4   | Tropical | Northern | 5.8  | NHR |
| Uganda              | 0.3   | Tropical | Northern | 10.2 | SHR |
| Ecuador             | -0.2  | Tropical | Southern | 1.5  | NHR |
| Kenya               | -1.3  | Tropical | Southern | 3.3  | NHR |
| Rwanda              | -2.0  | Tropical | Southern | 3.6  | NHR |
| D. R. of the Congo  | -4.3  | Tropical | Southern | 1.8  | NHR |
| Congo               | -4.7  | Tropical | Southern | 6.4  | SHR |
| Tanzania            | -6.2  | Tropical | Southern | 1.2  | NHR |
| Indonesia           | -6.2  | Tropical | Southern | 1.7  | NHR |
| Angola              | -8.8  | Tropical | Southern | 4.0  | NHR |
| Peru                | -12.0 | Tropical | Southern | 8.0  | SHR |
| Zambia              | -15.4 | Tropical | Southern | 9.2  | SHR |
| Bolivia             | -16.5 | Tropical | Southern | 6.5  | SHR |

|                      |              |                  |                 |      |            |
|----------------------|--------------|------------------|-----------------|------|------------|
| <b>Fiji</b>          | <b>-18.1</b> | <b>Tropical</b>  | <b>Southern</b> | 10.1 | <b>SHR</b> |
| <b>Madagascar</b>    | <b>-18.9</b> | <b>Tropical</b>  | <b>Southern</b> | 2.4  | <b>NHR</b> |
| <b>Mauritius</b>     | <b>-20.2</b> | <b>Tropical</b>  | <b>Southern</b> | 7.5  | <b>SHR</b> |
| <b>New Caledonia</b> | <b>-22.3</b> | <b>Tropical</b>  | <b>Southern</b> | 8.5  | <b>SHR</b> |
| Paraguay             | -25.3        | <i>Temperate</i> | <i>Southern</i> | 7.2  | <b>SHR</b> |
| South Africa         | -25.7        | <i>Temperate</i> | <i>Southern</i> | 7.3  | <b>SHR</b> |
| Mozambique           | -26.0        | <i>Temperate</i> | <i>Southern</i> | 3.2  | <b>NHR</b> |
| Chile                | -33.5        | <i>Temperate</i> | <i>Southern</i> | 7.7  | <b>SHR</b> |
| Argentina            | -34.6        | <i>Temperate</i> | <i>Southern</i> | 7.4  | <b>SHR</b> |
| Uruguay              | -34.9        | <i>Temperate</i> | <i>Southern</i> | 7.7  | <b>SHR</b> |
| Australia            | -33.9        | <i>Temperate</i> | <i>Southern</i> | 8.3  | <b>SHR</b> |
| New Zealand          | -41.3        | <i>Temperate</i> | <i>Southern</i> | 8.3  | <b>SHR</b> |

\* based on the latitude of the capital

\*\* second digit denotes the time within the month
